# Supplementary material
Source: PubMed Central journal article supplement (PMC5003237)
Supplement: pnas.1607602113.sapp.pdf [file pnas.1607602113.sapp.pdf]

## Alternative haplotypes of antigen processing genes in zebrafish diverged early in vertebrate evolution

Sean C. McConnell\*, Kyle M. Hernandez, Dustin J. Wcisel, Ross N. Kettleborough, Derek L. Stemple, Jeffrey A. Yoder, Jorge Andrade, and Jill L.O. de Jong\*

### \*Corresponding authors:

Sean C. McConnell  
email: [scmcconnell@uchicago.edu](mailto:scmcconnell@uchicago.edu)

Jill L.O. de Jong  
email: [jdejong@peds.bsd.uchicago.edu](mailto:jdejong@peds.bsd.uchicago.edu)

### Contents

|                                                                                                                                             |    |
|---------------------------------------------------------------------------------------------------------------------------------------------|----|
| Figure S1. Predicted peptide cleavage site residues selected from the alignment of human and zebrafish proteasome subunits.....             | 3  |
| Figure S2. Dotplot comparison of the zebrafish core MHC haplotype 19D assembly with haplotype 19B from the zebrafish reference genome. .... | 5  |
| Figure S3. Conserved synteny of the <i>psmb10</i> gene outside the core MHC region in jawed vertebrates. ....                               | 6  |
| Figure S4. Conserved synteny of the <i>tap2t</i> gene outside the core MHC region in teleosts. ....                                         | 7  |
| Figure S5. Phylogenetic tree for Psmb5, Psmb8, and Psmb11 predicted amino acid sequences from representative vertebrates. ....              | 9  |
| Figure S6. Phylogenetic tree for Psmb6, Psmb9, and Psmb12 predicted amino acid sequences from representative vertebrates. ....              | 12 |
| Figure S7. Phylogenetic tree for Psmb7, Psmb10, and Psmb13 predicted amino acid sequences from representative vertebrates. ....             | 14 |
| Figure S8. Phylogenetic tree for Abcb9, Tap1, Tap2 and Tap2t predicted amino acid sequences across representative vertebrates.....          | 16 |
| Table S1. Comparison of genes from the haplotype 19D assembly with genes from haplotype 19B from the zebrafish reference genome. ....       | 17 |

|                                                                                                                                                                      |           |
|----------------------------------------------------------------------------------------------------------------------------------------------------------------------|-----------|
| <b>Table S2. MHC-pathway related genes found outside the core MHC locus of the Zv9 reference genome compared with sequences within the CG2 clonal zebrafish.....</b> | <b>19</b> |
| <b>Table S3. Selected residues of the specificity loop within Tap2 molecules from species with polymorphic alleles.....</b>                                          | <b>20</b> |
| <b>Table S4. Proteasome subunit combinations in zebrafish.....</b>                                                                                                   | <b>21</b> |
| <b>Table S5. Comparison of SNP variant calls identified from whole exome sequencing. ...</b>                                                                         | <b>22</b> |
| <b>Table S6. Zebrafish proteasome subunit nomenclature. ....</b>                                                                                                     | <b>23</b> |
| <b>Table S7. Zebrafish TAP and <i>tapbp</i> gene nomenclature.....</b>                                                                                               | <b>24</b> |
| <b>Table S8. Accession numbers for selected teleost Psmb13 subunits. ....</b>                                                                                        | <b>25</b> |
| <b>Table S9. Polymorphic peptide binding residues conserved between zebrafish and human MHCI molecules.....</b>                                                      | <b>26</b> |
| <b>Table S10. Polymorphic peptide binding residues conserved between zebrafish and human MHCI molecules (continued).....</b>                                         | <b>28</b> |
| <b>Table S11. Divergent alleles encoding proteasome, TAP, and MHCI molecules within different vertebrates. ....</b>                                                  | <b>30</b> |
| <b>Table S12. Divergent alleles encoding proteasome, TAP, and MHCI molecules within additional vertebrates.....</b>                                                  | <b>32</b> |
| <b>Table S13. Combined allelic diversity estimates for proteasome, TAP, and MHCI molecules. ....</b>                                                                 | <b>33</b> |
| <b>Dataset S1. Accession numbers and sequence data for proteasome subunits.....</b>                                                                                  | <b>34</b> |
| <b>Dataset S2. Accession numbers and sequence data for TAP subunits.....</b>                                                                                         | <b>34</b> |
| <b>Dataset S3. Transcripts associated with zebrafish chromosome 19 core MHC haplotype D genes.....</b>                                                               | <b>34</b> |
| <b>Dataset S4. Zebrafish antigen processing genes from the divergent chromosome 19 haplotype D. ....</b>                                                             | <b>34</b> |
| <b>Dataset S5. Zebrafish chromosome 19 core MHC scaffold sequences. ....</b>                                                                                         | <b>35</b> |
| <b>Supplementary references .....</b>                                                                                                                                | <b>36</b> |

| A       |   |    |    |    |    |    |    |    |    |    |     |     |     |     |     |
|---------|---|----|----|----|----|----|----|----|----|----|-----|-----|-----|-----|-----|
|         | 1 | 17 | 20 | 31 | 33 | 35 | 45 | 48 | 49 | 53 | 114 | 115 | 116 | 118 | 120 |
| PSMB5   | T | D  | A  | V  | K  | I  | M  | G  | A  | S  | D   | S   | E   | N   | I   |
| Psmb5   | T | D  | A  | V  | K  | I  | M  | G  | A  | S  | D   | S   | E   | N   | V   |
| PSMB8   | T | D  | A  | V  | K  | I  | M  | C  | A  | Q  | D   | E   | H   | T   | L   |
| Psmb8a  | T | D  | A  | A  | K  | I  | M  | S  | A  | Q  | D   | D   | N   | T   | L   |
| Psmb8f  | T | D  | A  | F  | K  | I  | M  | N  | A  | V  | S   | S   | S   | T   | L   |
| PSMB11  | T | D  | S  | S  | K  | I  | T  | T  | S  | A  | Y   | S   | D   | T   | L   |
| Psmb11b | T | D  | S  | S  | K  | I  | L  | T  | S  | A  | C   | S   | D   | T   | L   |
| Psmb11a | T | D  | A  | T  | K  | M  | M  | S  | G  | M  | C   | S   | D   | T   | L   |
| B       |   |    |    |    |    |    |    |    |    |    |     |     |     |     |     |
|         | 1 | 17 | 20 | 31 | 33 | 35 | 45 | 48 | 49 | 53 | 114 | 115 | 116 | 118 | 120 |
| PSMB6   | T | D  | T  | T  | K  | T  | R  | S  | A  | Q  | P   | M   | G   | M   | V   |
| Psmb6   | T | D  | T  | T  | K  | T  | R  | S  | A  | Q  | P   | V   | G   | M   | T   |
| PSMB9   | T | D  | V  | F  | K  | S  | L  | S  | A  | Q  | -   | L   | G   | M   | T   |
| Psmb9a  | T | D  | V  | M  | K  | S  | L  | S  | A  | Q  | -   | P   | S   | L   | T   |
| Psmb9b  | T | D  | V  | M  | K  | S  | L  | S  | A  | Q  | -   | P   | S   | L   | T   |
| Psmb12  | T | D  | A  | I  | K  | I  | I  | S  | L  | Q  | S   | L   | G   | M   | L   |
| C       |   |    |    |    |    |    |    |    |    |    |     |     |     |     |     |
|         | 1 | 17 | 20 | 31 | 33 | 35 | 45 | 48 | 49 | 53 | 114 | 115 | 116 | 118 | 120 |
| PSMB7   | T | D  | A  | C  | K  | H  | G  | T  | A  | D  | Y   | P   | H   | S   | D   |
| Psmb7   | T | D  | A  | C  | K  | H  | G  | T  | A  | E  | Y   | P   | H   | S   | D   |
| PSMB10  | T | D  | A  | C  | K  | H  | G  | V  | A  | E  | H   | P   | H   | S   | S   |
| Psmb10  | T | D  | A  | C  | K  | H  | G  | V  | A  | E  | Y   | P   | H   | S   | D   |
| Psmb13a | T | D  | A  | C  | K  | H  | G  | T  | A  | E  | G   | P   | Y   | S   | D   |
| Psmb13b | T | D  | A  | C  | K  | H  | G  | T  | A  | Q  | G   | P   | Y   | D   | D   |

**Figure S1. Predicted peptide cleavage site residues selected from the alignment of human and zebrafish proteasome subunits.**

Names for the human proteasome subunits are labeled in uppercase; zebrafish subunits are labeled with both uppercase and lowercase according to standard nomenclature and introduced names (Table S5). Sequences from zebrafish core MHC haplotype 19B (Zv9 reference genome) are highlighted in blue; sequences from core MHC haplotype 19D (CG2 clonal zebrafish) are highlighted in red. Sequences are provided in Dataset S1.

A) The predicted cleavage site residues of non-MHC linked proteasome subunits are mostly well-conserved between humans and zebrafish, e.g. PSMB5 shares 14 of 15 residues with psmb5, indicating highly-conserved functions for these genes. Positions 1, 17 and 33 are

completely conserved throughout all subunits, representing catalytic residues in the active site. Substitutions at positions 31 and 53 in particular have been proposed to alter peptide cleavage specificities for Psmb8 subunits with divergent lineages. The Psmb8a subunit (chymotrypsin-like catalytic activity) is found in the MHC haplotypes of most species examined including humans. The Psmb8f subunit appears to be missing from mammals, but is found in many other representative vertebrates. Altered activity of the Psmb8f subunit, as a consequence of these substitutions (predicted elastase-like catalytic activity), may thus contribute to functionally-specialized antigen processing pathways in organisms such as zebrafish.

B) In contrast, predicted cleavage specificity of the Psmb9b subunit encoded by on haplotype D is identical to the Psmb9a subunit encoded by haplotype B. In addition to carrying *psmb8a*, *psmb9a*, and *psmb13a* genes, the reference genome haplotype B also carries a *psmb12* gene. Unlike the divergent *psmb8f*, *psmb9b*, and *psmb13b* genes, the *psmb12* gene is missing from the divergent haplotype D assembly.

C) Position 53 may play a role in modulating peptide cleavage specificity among divergent zebrafish Psmb13 subunits, as the divergent Psmb13b subunit encoded by haplotype D maintains a unique substitution at position E53Q predicted to reduce trypsin-like cleavage specificity. Position 118 also has another interesting substitution within Psmb13b, S118D, but whether this could help compensate for any loss of charge within the cleavage site from the E53Q substitution remains to be determined.

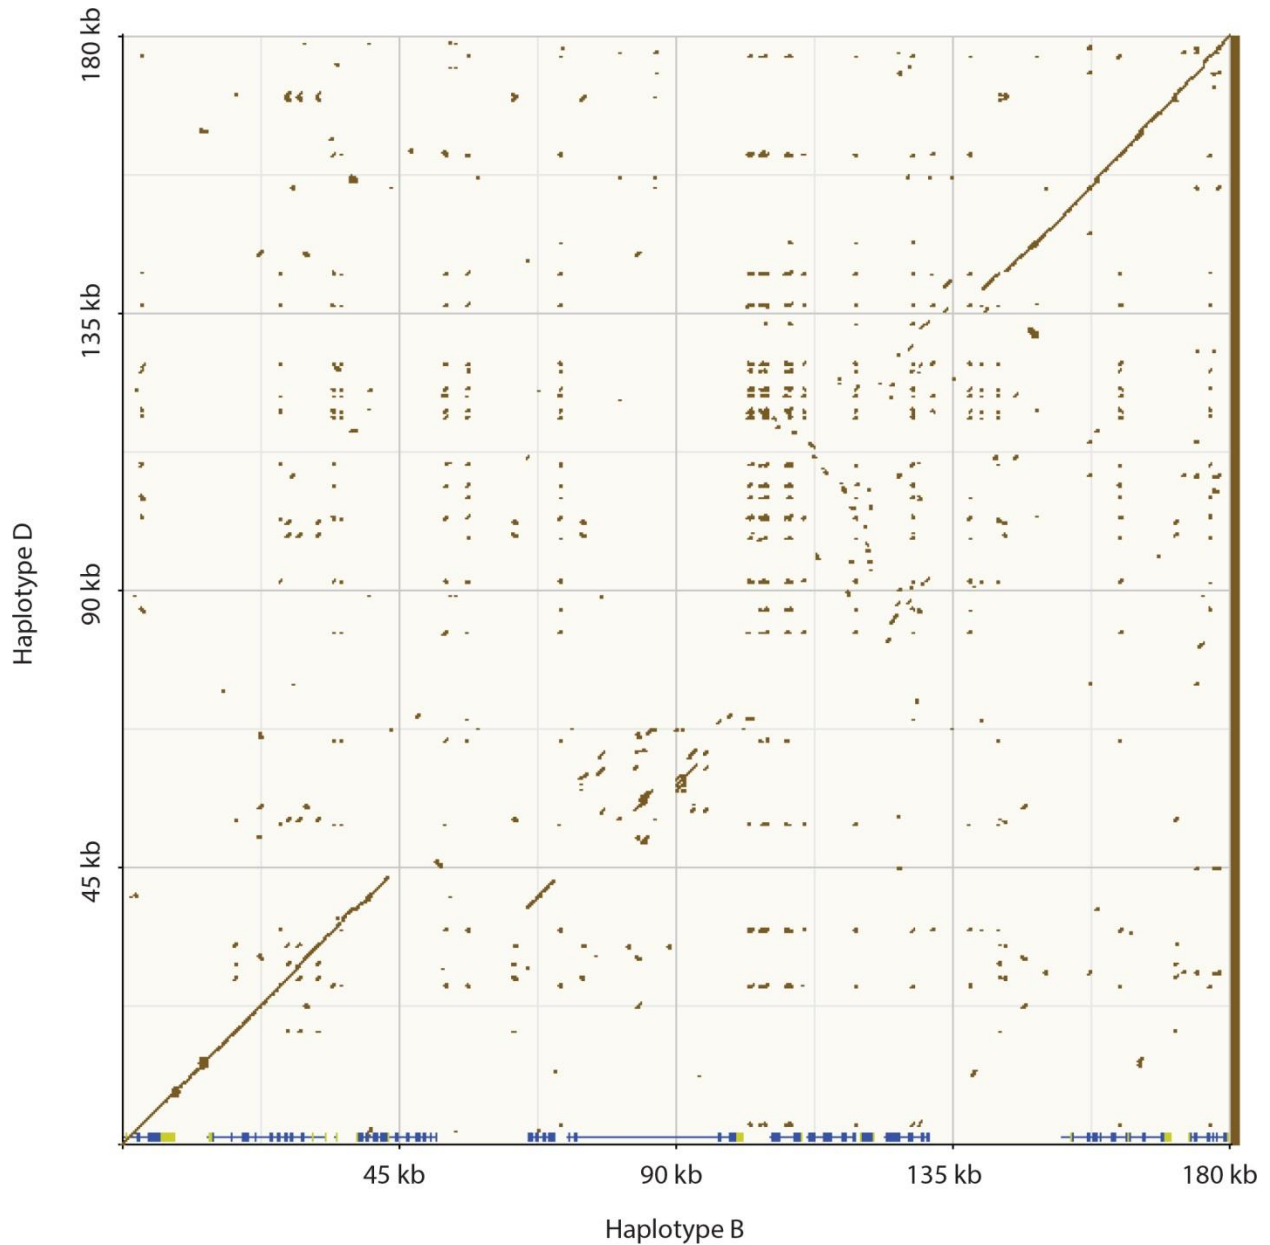

**Figure S2. Dotplot comparison of the zebrafish core MHC haplotype 19D assembly with haplotype 19B from the zebrafish reference genome.** The dotplot was generated using zPicture (<http://zpicture.dcode.org>) with sequences from the haplotype 19D assembly (CG2v1.0, this study) compared with sequences from reference haplotype 19B (Zv9 coordinates chr19:7623109:7802660). Exon locations for genes from the reference assembly are highlighted in blue, centered on *mhc1uba* intron 2 positioned at 90 kb.

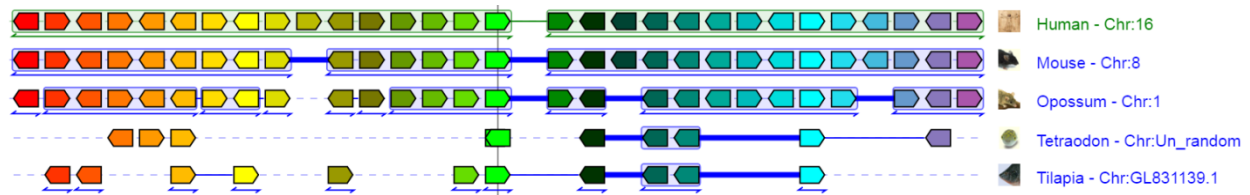

**Figure S3. Conserved synteny of the *psmb10* gene outside the core MHC region in jawed vertebrates.**

The *psmb10* gene (also called *LMP-10* or *MECL-1*) is the only immunoproteasome gene not linked to the core MHC region. Conserved synteny for the *psmb10* gene (highlighted by the green arrowheads joined by a vertical line in the center) is maintained for some jawed vertebrate species, including sarcopterygii and teleosts. This conserved synteny includes flanking genes *smpd3*, *prmt7*, *slc7a6*, *pla2g15*, *lcat*, *pskh1*, *edc4*, *nutf2*, and *ranbp10*. The region surrounding the *psmb10* gene in some species such as *psmb10* on zebrafish (*Danio rerio*) chromosome 4 appears to have been more highly rearranged (not shown), compared with *psmb10* genomic sequences in other teleost species such as tilapia (*Oreochromis niloticus*), where neighboring syntenic genes for the *psmb10* gene are more readily identified (bottom line). Conserved synteny analysis was performed in 'AlignView' using the Genomicus tool (<http://www.genomicus.biologie.ens.fr/>), which is based on genomic sequences and annotation as found in Ensembl.

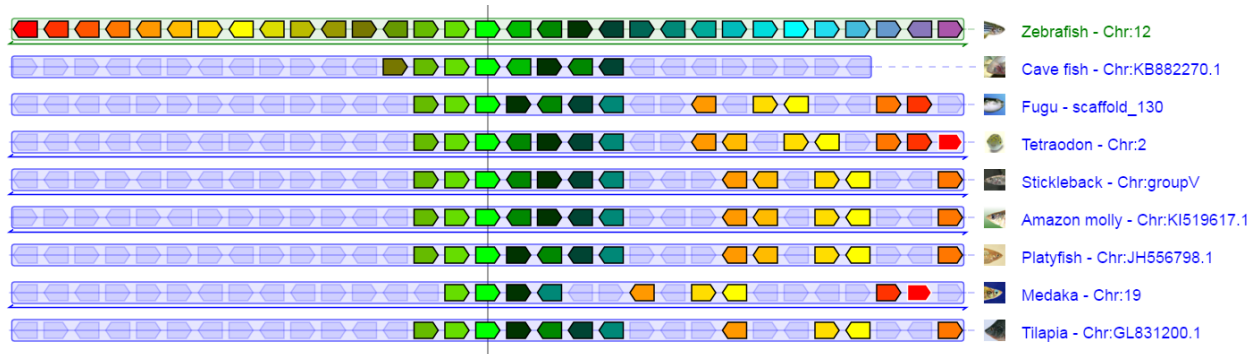

**Figure S4. Conserved synteny of the *tap2t* gene outside the core MHC region in teleosts.**

Unlike other transporter associated with antigen processing (TAP) genes, the *tap2t* gene was identified only in teleosts. Teleost species such as zebrafish (*Danio rerio*), fugu (*Takifugu rubripes*), stickleback (*Gasterosteus aculeatus*) and medaka (*Oryzias latipes*) maintain conserved synteny surrounding the *tap2t* gene. This conserved synteny surrounding *tap2t* (highlighted by the green arrowheads joined by a vertical line in the center) includes the *kcdt2*, *slc16a5*, *chad*, *acsf2*, *armc7*, *ndel1a*, *srcap*, *bc2*, *tll6*, and *hoxb6b* genes. Conserved synteny analysis was performed using the Genomicus tool (<http://www.genomicus.biologie.ens.fr/>), which is based on genomic sequences and annotation as found in Ensembl.

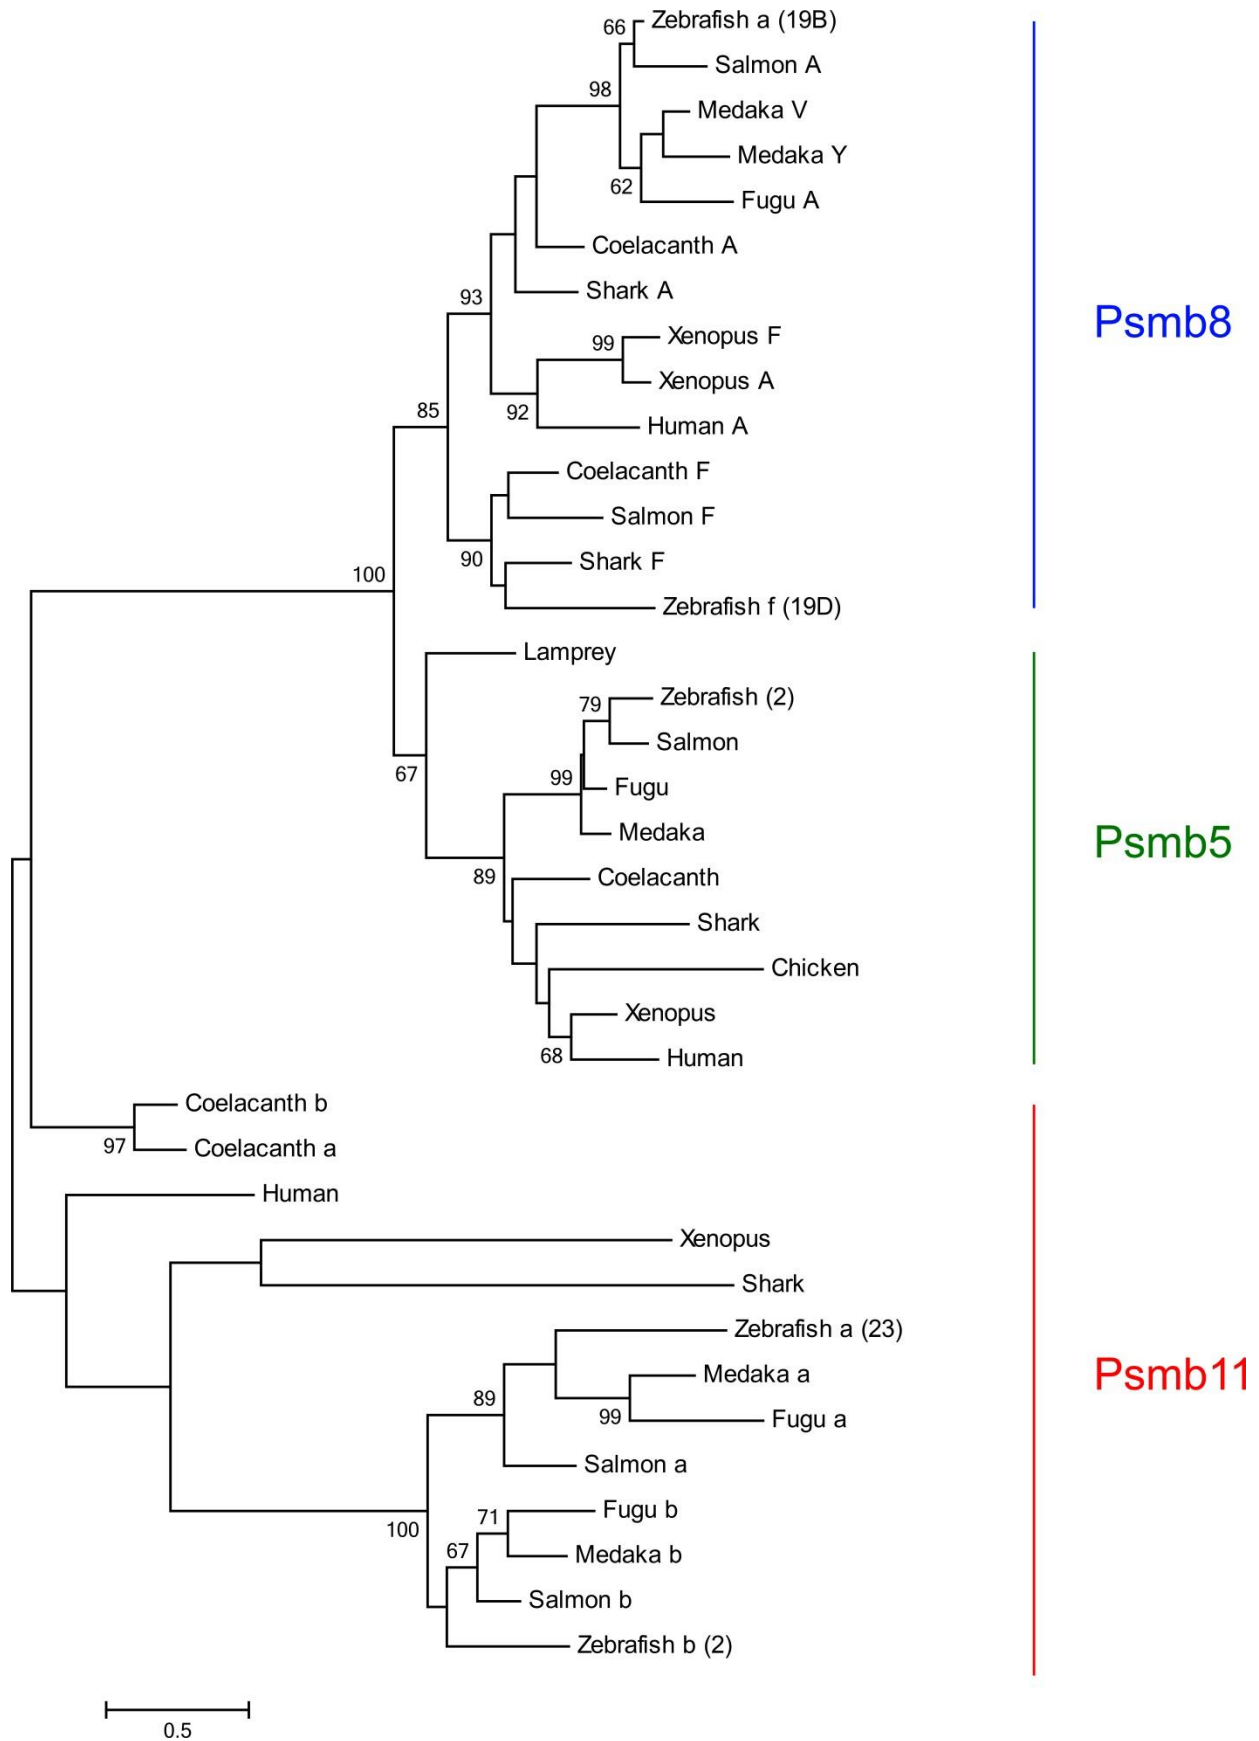



**Figure S5. Phylogenetic tree for Psmb5, Psmb8, and Psmb11 predicted amino acid sequences from representative vertebrates.**

Three major lineage branches are highlighted. Subunits from all three major lineage branches, including constitutive  $\beta 5$  subunit Psmb5, inducible  $\beta 5i$  subunit Psmb8, and thymoproteasome  $\beta 5t$  subunit Psmb11, are highly conserved across jawed vertebrates. Jawless vertebrates (e.g. lamprey) only have the constitutive Psmb5 subunit. Only jawed vertebrate species with MHC-based immunity have been shown to have additional (non-constitutive) proteasome subunit genes, reflecting the function of these genes.

The *psmb8* gene has two distinct forms in zebrafish associated with alternative haplotypes; *psmb8a* is present in the zebrafish reference genome chromosome 19 core MHC haplotype B, while *psmb8f* is expressed from core MHC haplotype D. These *psmb8* forms are ancient, being conserved for approximately 500 million years in sharks, some teleosts, and coelacanths. Interestingly, the *psmb8f* form appears to have been lost from most tetrapods and other teleosts (1). However, *psmb8f*-like forms appear to have been re-derived in some teleost lineages, as in medaka via a V31Y substitution. Furthermore, the *psmb8f* form appears to have been eroded in *Xenopus*, by sequence exchange events on either side of the bulky cleavage site residue A31F, making this *psmb8f* gene appear more *psmb8a*-like (2). In zebrafish, the Psmb8f subunit has the bulky A31F, and also a Q53V substitution predicted to alter peptide cleavage specificity. These observations indicate that the alternative forms of Psmb8 subunits conserve ancient, distinctive functions.

In another branch, the  $\beta 5t$  subunit Psmb11 maintains two duplicate genes that appear to be specific to teleosts, diverging on separate chromosomes. These genes are predicted to have distinct functions, with *psmb11b* more conserved than the *psmb11a* copy that is found adjacent to the *psmb5* gene (3). Coelacanths also maintain two *psmb11* copies, but these appear on the same chromosome and are much more closely related, thus appearing to be the result of a more recent tandem duplication event.

The Maximum Likelihood method based on the JTT matrix-based model was used to construct the phylogenetic tree within the MEGA6 program. To model evolutionary rate differences among sites, a discrete Gamma distribution was used (5 categories, +G parameter = 0.5036), which allowed some sites to be evolutionarily invariable (0.0000% sites). Tree is drawn to scale, and branch lengths represent the number of substitutions per site. Bootstrap values greater than or equal to 60% are provided next to the branches, as calculated using 500

replicate trees. Positions with less than 95% site coverage were eliminated, providing a total of 234 positions for the 37 sequences in the dataset. For zebrafish genes, chromosome number is provided in parentheses, while for chromosome 19 core MHC genes a specific haplotype suffix is also provided.

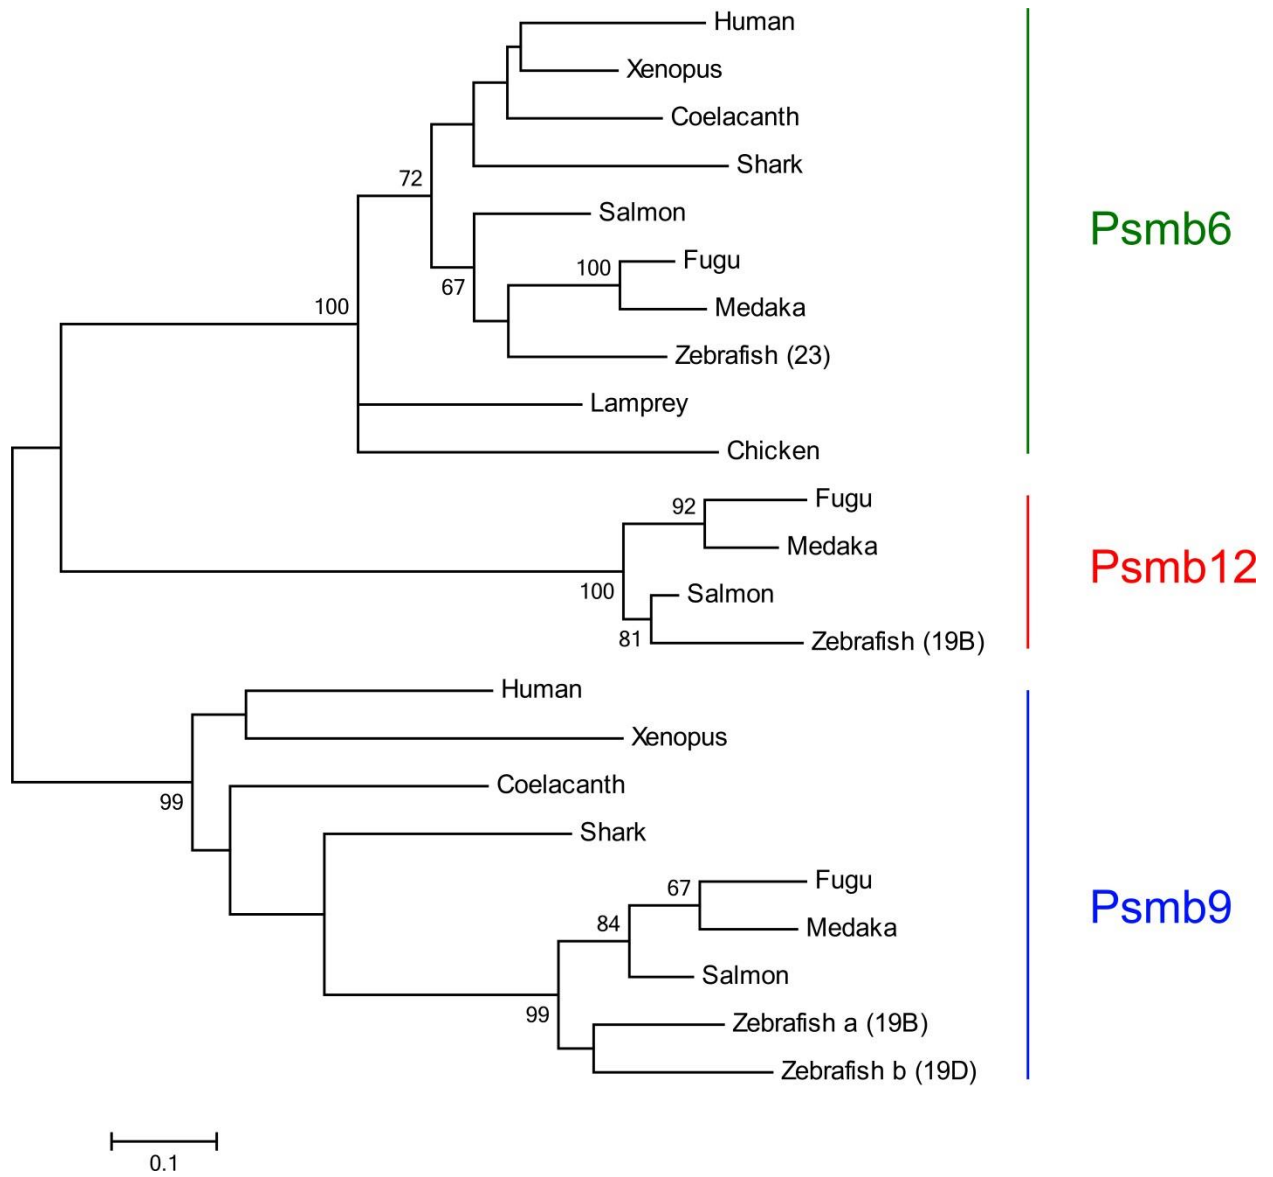

**Figure S6. Phylogenetic tree for Psmb6, Psmb9, and Psmb12 predicted amino acid sequences from representative vertebrates.**

Three major lineage branches are highlighted. Both  $\beta 1$  subunit Psmb6, and  $\beta 1i$  subunit Psmb9, are highly conserved across jawed vertebrates. Jawless vertebrates (e.g. lamprey) only have constitutive Psmb6. The  $\beta 1t$  subunit Psmb12 appears to be teleost-specific as it is not found in other vertebrate lineages. The *psmb12* gene undergoes presence/absence variation in zebrafish, e.g. while present in the zebrafish reference genome chromosome 19 core MHC haplotype B, it is missing from core MHC haplotype D.

The Maximum Likelihood method based on the JTT matrix-based model was used to construct the phylogenetic tree within the MEGA6 program. To model evolutionary rate differences among sites, a discrete Gamma distribution was used (5 categories, +G parameter = 0.9091), which allowed some sites to be evolutionarily invariable (5.2118% sites). Tree is drawn to scale, and branch lengths represent the number of substitutions per site. Bootstrap values greater than or equal to 60% are provided next to the branches, as calculated using 500 replicate trees. Positions with less than 95% site coverage were eliminated, providing a total of 214 positions for the 23 sequences in the dataset. For zebrafish genes, chromosome number is provided in parentheses, while for chromosome 19 core MHC genes a specific haplotype suffix is also provided.

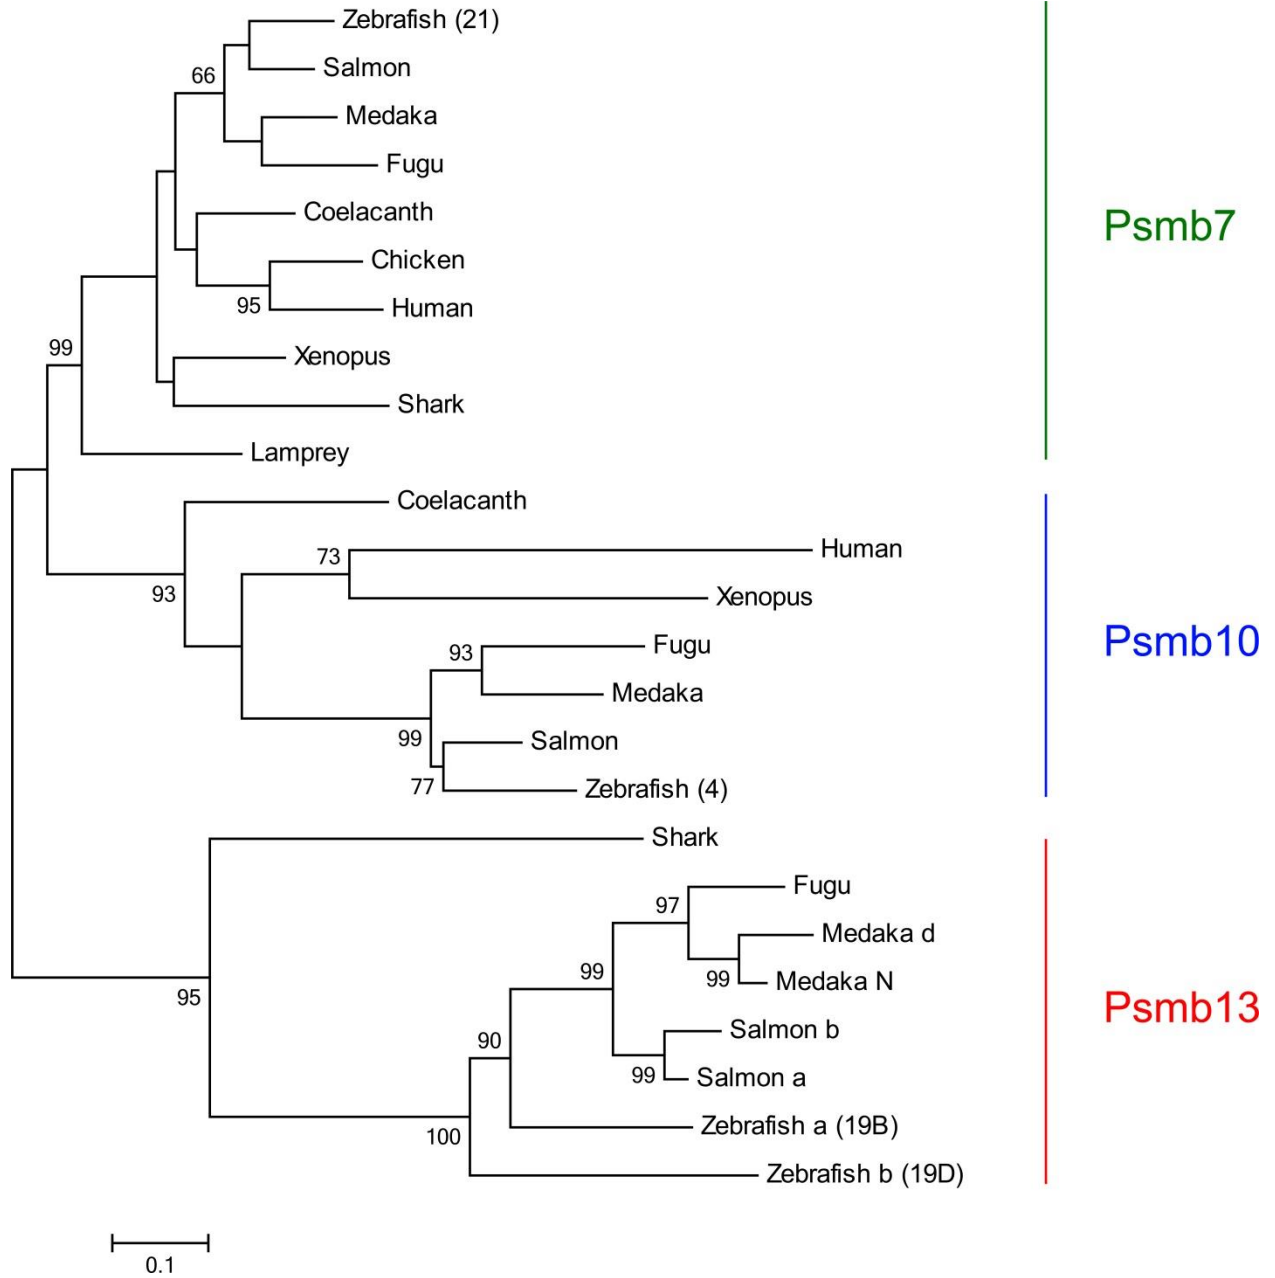

**Figure S7. Phylogenetic tree for Psmb7, Psmb10, and Psmb13 predicted amino acid sequences from representative vertebrates.**

Three major lineage branches are highlighted. The  $\beta 2$  subunit Psmb7, as well as the  $\beta 2i$  subunit Psmb10, are both highly conserved across most jawed vertebrates. Jawless vertebrates such as lamprey only have the constitutive Psmb7. The  $\beta 2t$  subunit Psmb13 was not found in some other vertebrate lineages and appears to be specific to teleost and sharks. The *psmb13* gene has two forms in zebrafish associated with alternative haplotypes; *psmb13a* is present in the zebrafish reference genome chromosome 19 core MHC haplotype B, while *psmb13b* is expressed from core MHC haplotype D. The divergent Psmb13b zebrafish proteasome subunit has an E53Q substitution predicted to alter peptide cleavage specificity.

The Maximum Likelihood method based on the JTT matrix-based model was used to construct the phylogenetic tree within the MEGA6 program. To model evolutionary rate differences among sites, a discrete Gamma distribution was used (5 categories, +G parameter = 0.9279), which allowed some sites to be evolutionarily invariable (12.3292% sites). Tree is drawn to scale, and branch lengths represent the number of substitutions per site. Bootstrap values greater than or equal to 60% are provided next to the branches, as calculated using 500 replicate trees. Positions with less than 95% site coverage were eliminated, providing a total of 274 positions for the 25 sequences in the dataset. For zebrafish genes, chromosome number is provided in parentheses, while for chromosome 19 core MHC genes a specific haplotype suffix is also provided.

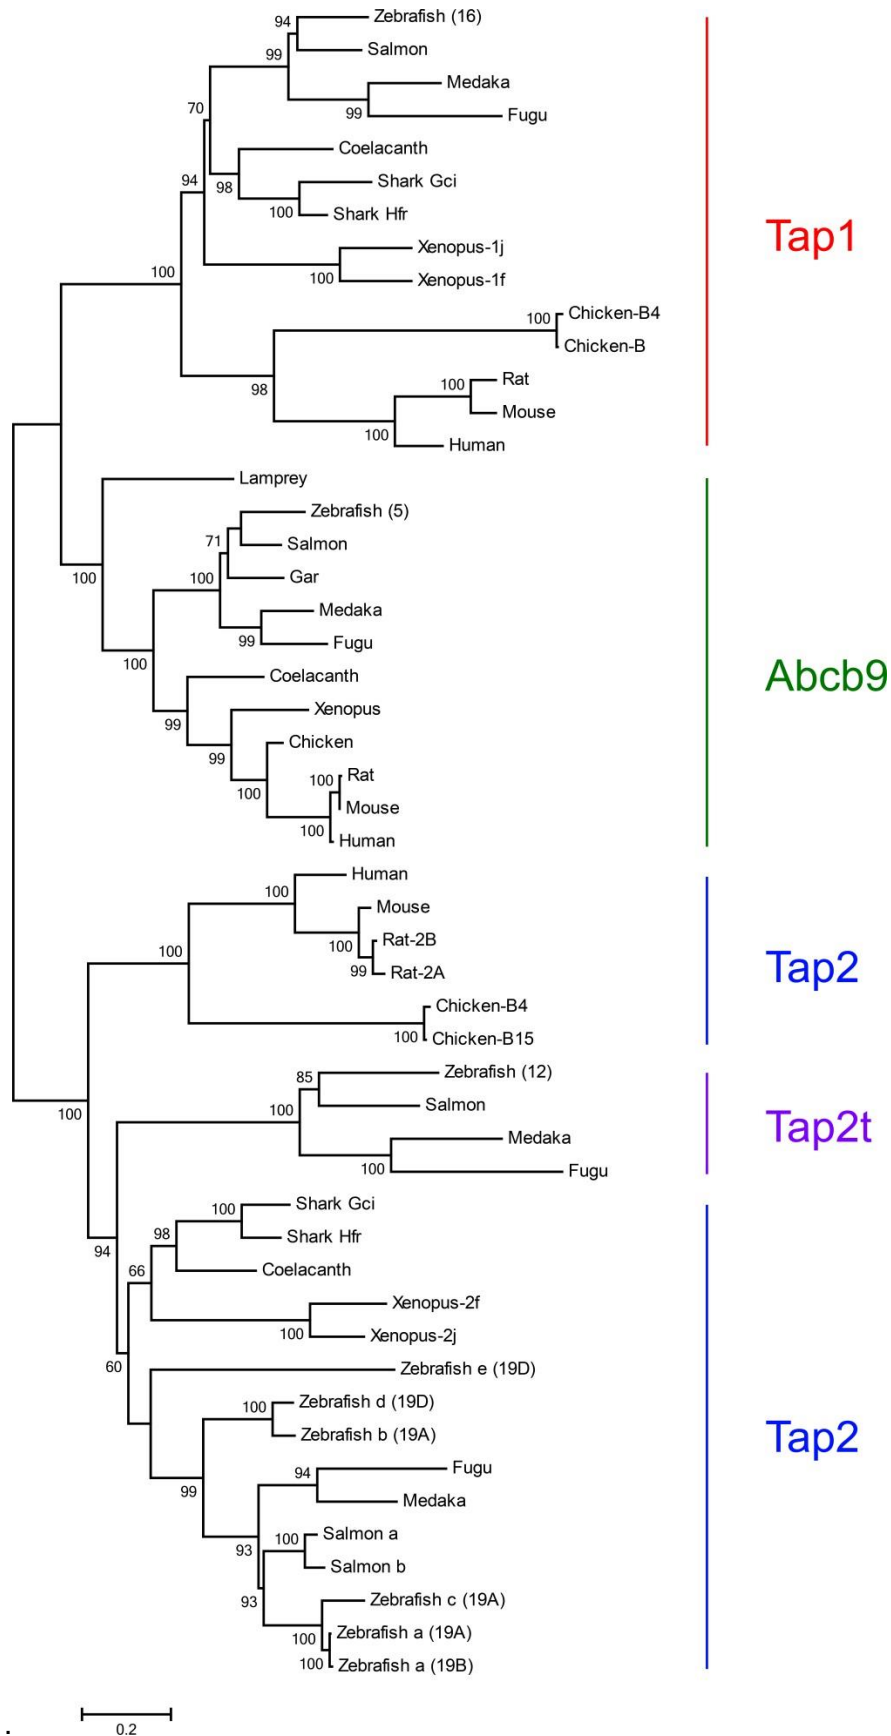

**Figure S8. Phylogenetic tree for Abcb9, Tap1, Tap2 and Tap2t predicted amino acid sequences across representative vertebrates.**

Three major lineage branches are highlighted. The presumed ancestral Abcb9 subunit, as well as the derived heterodimeric Tap1 and Tap2 subunits, are each highly conserved across most jawed vertebrates. Jawless vertebrates such as lamprey only have the Abcb9 subunit. The Tap2t subunit was not found in other vertebrate lineages and appears to be specific to teleosts; Tap2t subunits from teleosts cluster as a distinctive branch within the larger Tap2 family. The *tap2* gene has five forms in zebrafish associated with alternative haplotypes. The *tap2a* gene is present in the zebrafish reference genome chromosome 19 core MHC haplotype B. The *tap2a*, *tap2b*, and *tap2c* are all found in core MHC haplotype A. In addition, *tap2d* and *tap2e* are expressed from core MHC haplotype D. The divergent zebrafish Tap2 subunits maintain several substitutions predicted to alter peptide cleavage specificity.

The Maximum Likelihood method based on the JTT matrix-based model was used to construct the phylogenetic tree within the MEGA6 program. To model evolutionary rate differences among sites, a discrete Gamma distribution was used (5 categories, +G parameter = 1.9675), which allowed some sites to be evolutionarily invariable (2.7601% sites). Tree is drawn to scale, and branch lengths represent the number of substitutions per site. Bootstrap values greater than or equal to 60% are shown are provided next to the branches, as calculated using 500 replicate trees. Positions with less than 95% site coverage were eliminated, providing a total of 560 positions for the 51 sequences in the dataset. For zebrafish genes, chromosome number is provided in parentheses, while for some chromosome 19 core MHC genes a specific haplotype letter suffix is also given. Three major lineage branches are highlighted.



| RNA-Seq contig | Genomic scaffold(s) | Hap D gene     | %ID | Hap B gene (best match) | Chr. |
|----------------|---------------------|----------------|-----|-------------------------|------|
| 17561          | 13206               | <i>daxx</i>    | 99  | <i>daxx</i>             | 19   |
| 3129           | 13206               | <i>tapbp</i>   | 98  | <i>tapbp</i>            | 19   |
| 218            | 13206, 51738        | <i>mhc1uga</i> | 49  | <i>mhc1uba</i>          | 19   |
| 10154          | 15837               | <i>tap2d</i>   | 65  | <i>tap2a</i>            | 19   |
| 11205          | 15837               | <i>psmb9b</i>  | 86  | <i>psmb9a</i>           | 19   |
| 2067           | 15837, 2546         | <i>psmb13b</i> | 71  | <i>psmb13a</i>          | 19   |
| 818            | 2546                | <i>psmb8f</i>  | 64  | <i>psmb8a</i>           | 19   |
| 14104, 23407   | 2546                | <i>tap2e</i>   | 50  | <i>tap2a</i>            | 19   |
| 2621           | 2546                | <i>brd2a</i>   | 100 | <i>brd2a</i>            | 19   |
| 12208          | 2546                | <i>hsd17b8</i> | 99  | <i>hsd17b8</i>          | 19   |

**Table S1. Comparison of genes from the haplotype 19D assembly with genes from haplotype 19B from the zebrafish reference genome.** For each gene found within the CG2 haplotype D assembly, RNA-Seq contigs and genomic scaffold identifiers are provided. Blue font highlights genes with high levels of pairwise percent identity (%ID) relative to the reference genome sequences, and red font highlights genes having divergent sequences relative to the reference genome (below 90%). Pairwise percent identity (%ID) was calculated with BLAST using predicted amino acid sequences for genes from haplotype 19D, compared with sequences from the most closely matched genes from reference haplotype 19B (Zv9).

| RNA-Seq<br>contig | Genomic scaffold(s)        | CG2 gene       | %ID | Zv9 (best match) | Chr. |
|-------------------|----------------------------|----------------|-----|------------------|------|
| 4054              | 75501                      | <i>psmb5</i>   | 99  | <i>psmb5</i>     | 2    |
| 12947             | 6167, 48866, 28756         | <i>psmb6</i>   | 99  | <i>psmb6</i>     | 23   |
| 6794              | 70674, 78660,<br>C10987108 | <i>psmb7</i>   | 100 | <i>psmb7</i>     | 21   |
| 10534             | 18415, 26616               | <i>psmb10</i>  | 100 | <i>psmb10</i>    | 4    |
| NA                | 75501                      | <i>psmb11a</i> | 99  | <i>psmb11a</i>   | 23   |
| NA                | 26712                      | <i>psmb11b</i> | 100 | <i>psmb11b</i>   | 2    |
| 4392              | 86824                      | <i>abcb9</i>   | 99  | <i>abcb9</i>     | 5    |
| 1051              | 16168, 7509, 70724         | <i>tap1</i>    | 100 | <i>tap1</i>      | 16   |
| 9121              | 10598, 26828               | <i>tap2t</i>   | 99  | <i>tap2t</i>     | 12   |
| 18099             | 17582                      | <i>tapbpl</i>  | 99  | <i>tapbpl</i>    | 16   |
| 777               | 17862                      | <i>b2m</i>     | 100 | <i>b2m</i>       | 4    |
| NA                | 11566                      | <i>b2ml</i>    | 99  | <i>b2ml</i>      | 8    |
| 15805             | 68974                      | <i>cd8a</i>    | 99  | CD8a             | 21   |
| 32479             | 71708                      | <i>cd8b</i>    | 100 | CD8b             | 7    |
| 6200              | 1788                       | <i>mhc2daa</i> | 99  | <i>mhc2daa</i>   | 8    |
| 2953              | 1788                       | <i>mhc2dab</i> | 91  | <i>mhc2dab</i>   | 8    |
| 14906             | 44652                      | <i>mhc2dbb</i> | 98  | <i>mhc2dbb</i>   | 18   |

**Table S2. MHC-pathway related genes found outside the core MHC locus of the Zv9 reference genome compared with sequences within the CG2 clonal zebrafish.**

For each gene found within the CG2 genomic assembly, RNA-Seq contigs and genomic scaffold identifiers are provided. Blue font highlights genes with high levels of pairwise percent identity (%ID) relative to the reference genome sequences, and red font highlights genes having divergent sequences relative to the reference genome (below 90%). Pairwise percent identity (%ID) was calculated with BLAST using predicted amino acid sequences for genes from CG2 clonal zebrafish, compared with sequences from the most closely matched genes from zebrafish reference genome (Zv9). NA indicates that no expressed transcripts were found, as expected for the thymus-specific *psmb11* genes as no thymic tissue was included in the RNA preparation.

|             | 2 | 2 | <b>2</b> | 2 | 2 | 2 | 2 | 2 | <b>2</b> | 2 | 2 | <b>2</b> | 2        | 2 | 2 |   |
|-------------|---|---|----------|---|---|---|---|---|----------|---|---|----------|----------|---|---|---|
|             | 1 | 1 | <b>1</b> | 1 | 1 | 2 | 6 | 6 | <b>6</b> | 6 | 6 | 6        | <b>6</b> | 6 | 6 |   |
|             | 5 | 6 | <b>7</b> | 8 | 9 | 0 | 0 | 1 | <b>2</b> | 3 | 4 | 5        | <b>6</b> | 7 | 8 | 9 |
| Tap2a (19B) | M | C | <b>A</b> | I | N | S | M | G | <b>R</b> | A | V | A        | <b>L</b> | N | V | N |
| Tap2a (19A) | M | C | <b>A</b> | I | N | S | M | G | <b>R</b> | A | V | A        | <b>L</b> | N | V | N |
| Tap2c (19A) | T | C | <b>V</b> | I | Y | S | M | G | <b>D</b> | A | V | A        | <b>L</b> | N | V | N |
| Tap2b (19A) | M | C | <b>T</b> | L | S | R | M | S | <b>Q</b> | S | V | A        | <b>M</b> | N | V | N |
| Tap2d (19D) | M | L | <b>T</b> | I | S | R | M | S | <b>Q</b> | S | V | A        | <b>M</b> | N | V | N |
| Tap2e (19D) | M | C | <b>T</b> | L | S | R | M | S | <b>R</b> | S | L | A        | <b>A</b> | N | V | N |
| Tap2t (12)  | M | F | <b>S</b> | L | N | R | M | G | <b>R</b> | A | V | A        | <b>M</b> | N | V | N |
| Salmon-2t   | M | C | <b>S</b> | L | S | R | M | G | <b>R</b> | S | V | A        | <b>L</b> | N | S | N |
| Salmon-2a   | M | C | <b>A</b> | I | N | S | M | G | <b>R</b> | A | V | A        | <b>L</b> | N | V | N |
| Salmon-2b   | M | C | <b>A</b> | I | N | S | M | A | <b>R</b> | A | L | A        | <b>L</b> | N | V | N |
| Shark Hfr   | M | F | <b>T</b> | M | S | R | M | S | <b>R</b> | S | I | G        | <b>L</b> | N | V | N |
| Shark Gci   | M | F | <b>T</b> | M | Y | R | M | S | <b>R</b> | S | I | A        | <b>A</b> | N | V | N |
| Chick-B4    | T | F | <b>I</b> | R | F | R | A | S | <b>N</b> | V | L | A        | <b>L</b> | N | I | N |
| Chick-B15   | T | F | <b>I</b> | G | F | R | A | S | <b>N</b> | V | L | T        | <b>L</b> | N | I | N |
| Xenopus-2f  | M | F | <b>S</b> | H | S | S | V | S | <b>R</b> | A | I | A        | <b>A</b> | N | V | N |
| Xenopus-2j  | M | F | <b>S</b> | L | A | R | V | S | <b>R</b> | S | I | A        | <b>A</b> | N | V | N |
| Mouse       | L | F | <b>T</b> | M | S | R | M | S | <b>R</b> | W | L | P        | <b>F</b> | N | A | N |
| Rat-2B      | L | F | <b>T</b> | M | S | R | M | S | <b>R</b> | W | L | P        | <b>F</b> | N | A | N |
| Rat-2A      | L | F | <b>A</b> | E | S | R | M | S | <b>Q</b> | W | L | S        | <b>L</b> | N | A | N |
| Human       | T | Y | <b>T</b> | M | S | R | M | S | <b>N</b> | W | L | P        | <b>L</b> | N | A | N |

**Table S3. Selected residues of the specificity loop within Tap2 molecules from species with polymorphic alleles.** An alignment of deduced amino acid sequences highlights three cis-modification (cim) residues at positions **217**, **262**, and **266** (above in bold) that have been shown to have functional roles in determining Tap2 peptide transport specificity (4). Zebrafish chromosome and core MHC haplotype identifiers are provided in parentheses (when applicable). Accession numbers and species identifiers are provided in Dataset S1.

| Human     |           |           | Zebrafish |           |           |                |
|-----------|-----------|-----------|-----------|-----------|-----------|----------------|
| $\beta 5$ | $\beta 6$ | $\beta 7$ | $\beta 5$ | $\beta 6$ | $\beta 7$ |                |
| 5         | 6         | 7         | 5         | 6         | 7         | Constitutive   |
| 8         | 6         | 7         | 8a        | 6         | 7         | Intermediate 1 |
| 8         | 9         | 7         | 8f        | 6         | 7         | Intermediate 2 |
| 8         | 9         | 10        | 8a        | 9a        | 7         | Intermediate 3 |
| 11        | 9         | 10        | 8f        | 9a        | 7         | Intermediate 4 |
|           |           |           | 8a        | 9b        | 7         | Intermediate 5 |
|           |           |           | 8f        | 9b        | 7         | Intermediate 6 |
|           |           |           | 8a        | 9a        | 10        | Immuno- 1      |
|           |           |           | 8f        | 9a        | 10        | Immuno- 2      |
|           |           |           | 8a        | 9b        | 10        | Immuno- 3      |
|           |           |           | 8f        | 9b        | 10        | Immuno- 4      |
|           |           |           | 8a        | 9a        | 13a       | Immuno- 5      |
|           |           |           | 8f        | 9a        | 13a       | Immuno- 6      |
|           |           |           | 8a        | 9b        | 13a       | Immuno- 7      |
|           |           |           | 8f        | 9b        | 13a       | Immuno- 8      |
|           |           |           | 8a        | 9a        | 13b       | Immuno- 9      |
|           |           |           | 8f        | 9a        | 13b       | Immuno- 10     |
|           |           |           | 8a        | 9b        | 13b       | Immuno- 11     |
|           |           |           | 8f        | 9b        | 13b       | Immuno- 12     |
|           |           |           | 11a       | 9a        | 10        | Thymo- 1       |
|           |           |           | 11b       | 9a        | 10        | Thymo- 2       |
|           |           |           | 11a       | 9b        | 10        | Thymo- 3       |
|           |           |           | 11b       | 9b        | 10        | Thymo- 4       |
|           |           |           | 11a       | 9a        | 13a       | Thymo- 5       |
|           |           |           | 11b       | 9a        | 13a       | Thymo- 6       |
|           |           |           | 11a       | 9b        | 13a       | Thymo- 7       |
|           |           |           | 11b       | 9b        | 13a       | Thymo- 8       |
|           |           |           | 11a       | 9a        | 13b       | Thymo- 9       |
|           |           |           | 11b       | 9a        | 13b       | Thymo- 10      |
|           |           |           | 11a       | 9b        | 13b       | Thymo- 11      |
|           |           |           | 11b       | 9b        | 13b       | Thymo- 12      |

**Table S4. Proteasome subunit combinations in zebrafish.** Distinct proteasome subunit compositions in teleosts may number as high as 30, even when constrained according to cooperative subunit assembly rules (5), which specify for example Psmb8 incorporation before Psmb9. This suggests many additional subunit combinations in zebrafish compared with humans, where only five combinations are known.

|     | Hom.   | Het. | % Het. |
|-----|--------|------|--------|
| CG1 | 396319 | 7254 | 1.80   |
| CG2 | 533084 | 8618 | 1.59   |
| WT1 | 37161  | 6332 | 14.56  |
| WT2 | 57103  | 6381 | 10.05  |

**Table S5. Comparison of SNP variant calls identified from whole exome sequencing.** CG1 and CG2 double haploid clonal zebrafish samples were subjected to whole exome sequencing and analyzed for genetic variation. Pooled samples of each clonal line showed a substantial number of SNPs that varied from the reference genome (approximately 400,000-500,000), but the vast majority (>98%) were called as homozygous, approaching fixation of homozygous SNPs within each clonal line. Comparison of the clonal zebrafish heterozygous SNP percentages with the percentage of heterozygous SNPs identified from two individual wild-type samples (WT1 and WT2) showed that heterozygous SNPs are enriched by nearly an order of magnitude in the wild-type samples. This was observed even though each wild-type was sequenced and processed as an individual and not pooled, which may lead to fewer confident calls for each individual wild-type fish compared with four pooled clonal samples, especially for heterozygous SNPs due to fewer reads for each possible genotype. Of note, this SNP analysis likely over-estimates the genetic variation of the double haploid clonal lines, due to possible ambiguous mapping of paralogs or repeats, along with potential errors in sequencing from either genome. ‘Hom.’ represents number of homozygous SNPs, ‘Het.’ is the number of heterozygous SNPs, and ‘%Het.’ is the percentage of heterozygous SNPs when divided by the total, where Hom. + Het. = 100%.

| Gene names            | Subunit names | Additional Names                                       | Previous names        | ZFIN ID             | Ensembl Gene      | Chr. Haplo. |
|-----------------------|---------------|--------------------------------------------------------|-----------------------|---------------------|-------------------|-------------|
| <i>psmb5</i>          | beta5         | LMPX, constitutive proteasome subunit $\beta$ 5        | -                     | ZDB-GENE-990415-215 | ENSDARG0000075445 | 2           |
| <i>psmb6</i>          | beta1         | LMPY, delta, constitutive proteasome subunit $\beta$ 6 | -                     | ZDB-GENE-990415-216 | ENSDARG0000002240 | 23          |
| <i>psmb7</i>          | beta2         | LMPZ, constitutive proteasome subunit $\beta$ 7        | -                     | ZDB-GENE-001208-4   | ENSDARG0000037962 | 21          |
| <i>psmb8a</i>         | beta5ia       | LMP7A, immune-proteasome subunit 5ia                   | <i>psmb8</i>          | ZDB-GENE-990415-141 | ENSDARG0000001303 | 19 A        |
| <i>psmb8f</i>         | beta5if       | LMP7F, immune-proteasome subunit $\beta$ 5if           | -                     | ZDB-GENE-050417-319 |                   | 19 D        |
| <i>psmb9a</i>         | beta1ia       | LMP2A, immune-proteasome subunit $\beta$ 1ia           | -                     | ZDB-GENE-990415-140 | ENSDARG0000000656 | 19 A,B      |
| <i>psmb9b</i>         | beta1ib       | LMP2B, immune-proteasome subunit $\beta$ 1ib           | -                     | ZDB-GENE-001208-3   |                   | 19 D        |
| <b><i>psmb10</i></b>  | beta2i        | LMP10, MECL1, immune-proteasome subunit $\beta$ 2i     | <b><i>PSMB10</i></b>  | ZDB-GENE-040718-278 | ENSDARG0000043781 | 4           |
| <i>psmb11a</i>        | beta5ta       | Thymoproteasome subunit $\beta$ 5ta                    | -                     | ZDB-GENE-040724-32  | ENSDARG0000078253 | 23          |
| <i>psmb11b</i>        | beta5tb       | Thymoproteasome subunit $\beta$ 5tb                    | -                     |                     | ENSDARG0000068086 | 2           |
| <b><i>psmb12</i></b>  | beta1t        | LMP2/delta-like, teleost proteasome subunit $\beta$ 1t | <i>psmb9l, psmb11</i> | ZDB-GENE-001208-1   | ENSDARG0000031885 | 19 A,B      |
| <b><i>psmb13a</i></b> | beta2ta       | PSMB7/10-like, teleost proteasome subunit $\beta$ 2ta  | <i>psmb10, psmb12</i> | ZDB-GENE-001208-2   | ENSDARG0000001656 | 19 A,B      |
| <b><i>psmb13b</i></b> | beta2tb       | PSMBb7/10-like, teleost proteasome subunit $\beta$ 2tb | -                     |                     |                   | 19 D        |

**Table S6. Zebrafish proteasome subunit nomenclature.** Gene names approved by the zebrafish nomenclature committee are listed in the first column of this table, and names advanced by this study highlighted in bold (accommodating the novel genes). The ‘Subunit names’ and ‘Additional names’ columns both provide alternate identifiers. ‘Previous names’ refers to other potentially conflicting zebrafish nomenclature. The ZFIN and Ensembl database identifiers are listed for each gene when available. The final column provides chromosome (Chr.) and specific haplotype identifiers (Haplo.) for the zebrafish core MHC locus (when applicable).

| Gene names            | Additional Names                                                | Previous names   | ZFIN ID             | Ensembl Gene       | Chr. Haplo. |
|-----------------------|-----------------------------------------------------------------|------------------|---------------------|--------------------|-------------|
| <b><i>tap1</i></b>    | transporter associated with antigen processing ( <i>TAP</i> ) 1 | <i>abcb2</i>     | ZDB-GENE-050517-43  | ENSDARG00000079766 | 16          |
| <b><i>tap2a</i></b>   | <i>tap2</i> subunit type a                                      | <i>abcb311</i>   | ZDB-GENE-030616-245 | ENSDARG00000036787 | 19<br>A,B   |
| <b><i>tap2b</i></b>   | <i>tap2</i> subunit type b                                      | <i>abcb312</i>   | ZDB-GENE-030616-225 |                    | 19<br>A     |
| <b><i>tap2c</i></b>   | <i>tap2</i> subunit type c                                      | <i>abcb3</i>     | ZDB-GENE-990415-260 |                    | 19<br>A     |
| <b><i>tap2d</i></b>   | <i>tap2</i> subunit type d                                      | -                |                     |                    | 19<br>D     |
| <b><i>tap2e</i></b>   | <i>tap2</i> subunit type e                                      | -                |                     |                    | 19<br>D     |
| <b><i>tap2t</i></b>   | <i>tap2</i> subunit type t, teleost-specific                    | <i>tap2-like</i> | ZDB-GENE-130531-48  | ENSDARG00000033446 | 12          |
| <i>tapbp</i>          | tap binding protein, tapasin, tpsn                              | -                |                     |                    | 19<br>A,D   |
| <b><i>tapbp.1</i></b> | tap binding protein tandem duplicate 1, tapasin gene 1          | <i>TAPBP</i>     | ZDB-GENE-010110-2   | ENSDARG00000045011 | 19<br>B     |
| <b><i>tapbp.2</i></b> | tap binding protein tandem duplicate 2, tapasin gene 2          | <i>tapbp</i>     |                     | ENSDARG00000079402 | 19<br>B     |

**Table S7. Zebrafish TAP and *tapbp* gene nomenclature.** Gene names approved by the zebrafish nomenclature committee are listed in the first column of this table, and names proposed during this study are highlighted in bold (accommodating novel genes). The ‘Additional names’ column provides alternative identifiers. ‘Previous names’ refers to other potentially conflicting zebrafish nomenclature. The ZFIN and Ensembl database identifiers are listed for each gene when available. The final column provides chromosome (Chr.) and specific haplotype identifiers (Haplo.) for the zebrafish core MHC locus (when applicable).



|                                                 |                |
|-------------------------------------------------|----------------|
| Psmb13_Salmon_( <i>Salmo_salar</i> )            | ABQ59647       |
| Psmb13_Fugu_( <i>Takifugu_rubripes</i> )        | XP_003978905   |
| Psmb13_Medaka_( <i>Oryzias_latipes</i> )        | NP_001171882   |
| Psmb13_Damselfish_( <i>Stegastes_partitus</i> ) | XP_008301222   |
| Psmb13_A_Zebrafish_(19B)                        | NP_571752      |
| Psmb13_B_Zebrafish_(19D)                        | GDQH01002062.1 |

**Table S8. Accession numbers for selected teleost Psmb13 subunits.** For zebrafish (*Danio rerio*) sequence names, chromosome number and core MHC haplotype identifier are appended in parentheses.

| HLA-A<br>Specif. | C        | FS<br>T  |           | <b>M</b> |          | L                      | Q         | QH       | V        | S         | <b>H</b> | <b>IS</b> | NH       | A        |                       |           |           |    |
|------------------|----------|----------|-----------|----------|----------|------------------------|-----------|----------|----------|-----------|----------|-----------|----------|----------|-----------------------|-----------|-----------|----|
| HLA-B<br>Specif. | H        | DH       | PT        | EG<br>KT | HF       | P                      | D         | IT       | CF<br>SY | RI<br>T   | NK<br>S  |           | GY       |          | CG                    | NK        | P         | DH |
| HLA<br>Common    | <b>Y</b> | <b>Y</b> | <b>AS</b> | <b>M</b> | <b>Y</b> | <b>RQ</b><br><b>EG</b> | <b>NE</b> | NK       | M        | <b>AG</b> | Q        | <b>AT</b> | D        | EV       | <b>ND</b><br><b>S</b> | <b>IT</b> | <b>AL</b> | Y  |
| Position         | 7        | 9        | 24        | 45       | 59       | 62                     | 63        | 66       | 67       | 69        | 70       | 73        | 74       | 76       | 77                    | 80        | 81        | 84 |
| Uaa              | <b>Y</b> | <b>Y</b> | V         | <b>T</b> | <b>Y</b> | <b>R</b>               | <b>E</b>  | <b>I</b> | <b>F</b> | <b>G</b>  | A        | V         | F        | N        | <b>N</b>              | V         | I         | R  |
| Uba              | A        | <b>Y</b> | <b>A</b>  | F        | <b>Y</b> | <b>Q</b>               | <b>Q</b>  | <b>I</b> | L        | <b>G</b>  | Y        | V         | F        | N        | <b>N</b>              | V         | V         | R  |
| Uca              | A        | <b>Y</b> | <b>A</b>  | F        | <b>Y</b> | <b>Q</b>               | <b>Q</b>  | <b>I</b> | L        | <b>R</b>  | <b>H</b> | K         | F        | N        | <b>N</b>              | V         | <b>A</b>  | R  |
| Uda              | <b>Y</b> | <b>F</b> | <b>A</b>  | S        | <b>Y</b> | <b>R</b>               | <b>Q</b>  | L        | A        | <b>G</b>  | Y        | V         | <b>Y</b> | <b>V</b> | <b>D</b>              | <b>T</b>  | L         | R  |
| Uea              | <b>Y</b> | <b>Y</b> | V         | <b>T</b> | <b>Y</b> | <b>R</b>               | <b>E</b>  | <b>I</b> | <b>F</b> | <b>G</b>  | A        | V         | F        | N        | <b>N</b>              | V         | I         | R  |
| Ufa              | V        | <b>Y</b> | <b>A</b>  | V        | <b>F</b> | <b>R</b>               | <b>N</b>  | <b>I</b> | R        | N         | M        | L         | F        | N        | <b>N</b>              | <b>I</b>  | <b>A</b>  | R  |
| Uga              | <b>Y</b> | <b>Y</b> | M         | A        | <b>Y</b> | <b>I</b>               | <b>N</b>  | R        | L        | <b>A</b>  | <b>T</b> | <b>A</b>  | F        | N        | <b>N</b>              | V         | <b>A</b>  | R  |
| Uha              | A        | <b>Y</b> | <b>A</b>  | F        | <b>Y</b> | <b>Q</b>               | <b>E</b>  | <b>I</b> | L        | <b>G</b>  | <b>H</b> | <b>S</b>  | F        | N        | <b>N</b>              | V         | <b>A</b>  | R  |
| Uia              | <b>Y</b> | <b>I</b> | <b>S</b>  | <b>M</b> | <b>Y</b> | <b>R</b>               | <b>E</b>  | R        | E        | <b>G</b>  | <b>I</b> | V         | F        | N        | <b>N</b>              | <b>I</b>  | <b>A</b>  | R  |
| Uja              | <b>Y</b> | <b>Y</b> | <b>I</b>  | <b>M</b> | <b>F</b> | <b>R</b>               | <b>N</b>  | <b>I</b> | A        | <b>G</b>  | <b>T</b> | N         | F        | N        | <b>N</b>              | V         | <b>A</b>  | R  |
| Uka              | A        | <b>Y</b> | <b>A</b>  | F        | <b>Y</b> | <b>Q</b>               | <b>Q</b>  | <b>I</b> | L        | <b>R</b>  | <b>H</b> | <b>T</b>  | F        | N        | <b>N</b>              | V         | <b>A</b>  | R  |

**Table S9. Polymorphic peptide binding residues conserved between zebrafish and human MHC I molecules.** MHC Class I (MHC I) sequence polymorphisms predicted to be in contact with peptides in the binding cleft are shown for human HLA-A and HLA-B molecules. Residues are listed as specific to either HLA-A or HLA-B alleles, or common to both, as described (6). Columns provide MHC I residue numbering according to IMGT nomenclature. Amino acid polymorphism at these peptide binding sites is highly pervasive for the 11 zebrafish MHC I molecules, while the majority (~62% found across 34 positions) of these zebrafish polymorphic residues are also shared with HLA-A and/or HLA-B. Shared polymorphisms at each position are highlighted in bold. Polymorphisms are shared between zebrafish and humans at all positions, with the exception of position 84, where the Y84R substitution is found throughout non-mammalian vertebrates. This overlap in substitutions across species indicates either shared ancestry for these alleles preserved across species, or continued exploration through a highly conserved stereo-chemical space. Additional residues are shown in Table S10.



| HLA-A<br>Specif. | FV        | IK                                 | H                      | <b>RQ</b><br><b>EP</b> | V                                   |          |          |          | V   | RM                     | <b>AQ</b><br><b>S</b> | <b>ES</b> | LP       | PW                                  | R          | DI         |
|------------------|-----------|------------------------------------|------------------------|------------------------|-------------------------------------|----------|----------|----------|-----|------------------------|-----------------------|-----------|----------|-------------------------------------|------------|------------|
| HLA-B<br>Specif. | W         | <b>NS</b><br><b>TW</b><br><b>V</b> |                        | <b>NDK</b>             | L                                   | C        | IPS      | GL       |     | QT                     | <b>DE</b><br><b>T</b> | T         | CT       | M                                   | L          |            |
| HLA<br>Common    | <b>IL</b> | RM                                 | <b>CF</b><br><b>SY</b> | H                      | <b>ND</b><br><b>HF</b><br><b>SY</b> | <b>Y</b> | <b>T</b> | <b>W</b> | AP  | <b>AE</b><br><b>VW</b> | <b>RL</b><br><b>W</b> | APV       | <b>Y</b> | <b>AR</b><br><b>EG</b><br><b>LT</b> | <b>GSW</b> | <b>HTY</b> |
| Position         | 95        | 97                                 | 99                     | 114                    | 116                                 | 118      | 143      | 147      | 150 | 152                    | 156                   | 158       | 159      | 163                                 | 167        | 171        |
| Uaa              | <b>F</b>  | <b>W</b>                           | <b>Y</b>               | M                      | <b>Y</b>                            | <b>Y</b> | <b>T</b> | <b>W</b> | T   | <b>A</b>               | <b>Q</b>              | N         | <b>Y</b> | <b>T</b>                            | <b>W</b>   | <b>Y</b>   |
| Uba              | <b>F</b>  | F                                  | <b>Y</b>               | W                      | I                                   | <b>Y</b> | <b>T</b> | <b>W</b> | T   | <b>A</b>               | <b>W</b>              | G         | <b>Y</b> | <b>E</b>                            | <b>W</b>   | <b>Y</b>   |
| Uca              | L         | E                                  | <b>Y</b>               | R                      | <b>Y</b>                            | <b>Y</b> | <b>T</b> | <b>W</b> | D   | G                      | <b>D</b>              | N         | <b>Y</b> | <b>E</b>                            | <b>W</b>   | <b>Y</b>   |
| Uda              | I         | E                                  | <b>Y</b>               | Y                      | <b>D</b>                            | <b>Y</b> | <b>T</b> | <b>W</b> | D   | <b>A</b>               | <b>Q</b>              | N         | <b>Y</b> | <b>E</b>                            | <b>W</b>   | <b>Y</b>   |
| Uea              | <b>F</b>  | Q                                  | <b>Y</b>               | <b>D</b>               | I                                   | <b>Y</b> | <b>T</b> | <b>W</b> | N   | G                      | <b>Y</b>              | G         | <b>Y</b> | V                                   | <b>W</b>   | <b>Y</b>   |
| Ufa              | <b>F</b>  | F                                  | <b>V</b>               | W                      | <b>Y</b>                            | <b>Y</b> | <b>T</b> | <b>W</b> | N   | <b>A</b>               | <b>R</b>              | Q         | <b>Y</b> | Q                                   | <b>W</b>   | <b>Y</b>   |
| Uga              | <b>F</b>  | <b>V</b>                           | <b>Y</b>               | W                      | <b>Y</b>                            | <b>Y</b> | <b>T</b> | <b>W</b> | D   | <b>A</b>               | <b>T</b>              | <b>S</b>  | <b>Y</b> | <b>E</b>                            | <b>W</b>   | <b>Y</b>   |
| Uha              | N         | R                                  | <b>Y</b>               | F                      | <b>D</b>                            | <b>Y</b> | <b>T</b> | L        | D   | <b>A</b>               | <b>Y</b>              | N         | <b>Y</b> | <b>E</b>                            | <b>W</b>   | <b>Y</b>   |
| Uia              | V         | N                                  | <b>Y</b>               | <b>D</b>               | <b>Y</b>                            | <b>Y</b> | <b>T</b> | <b>W</b> | N   | <b>A</b>               | <b>Y</b>              | N         | <b>Y</b> | <b>E</b>                            | <b>W</b>   | <b>Y</b>   |
| Uja              | V         | A                                  | <b>Y</b>               | <b>K</b>               | F                                   | <b>Y</b> | <b>T</b> | <b>W</b> | D   | G                      | <b>D</b>              | N         | <b>Y</b> | V                                   | <b>W</b>   | <b>Y</b>   |
| Uka              | <b>F</b>  | E                                  | <b>Y</b>               | R                      | <b>Y</b>                            | <b>Y</b> | <b>T</b> | <b>W</b> | D   | G                      | <b>D</b>              | N         | <b>Y</b> | <b>E</b>                            | <b>W</b>   | <b>Y</b>   |

**Table S10. Polymorphic peptide binding residues conserved between zebrafish and human MHC I molecules (continued).** MHC Class I (MHCI) sequence polymorphisms predicted to be in contact peptides in the binding cleft are shown for human HLA-A and HLA-B molecules. Residues are listed as specific to either HLA-A or HLA-B alleles, or common to both, as described (6). Columns provide MHCI residue numbering according to IMGT nomenclature. Amino acid polymorphism at these sites is pervasive for the 11 zebrafish MHCI molecules, while the majority (>62% found across 34 positions) of these zebrafish polymorphic residues are also shared with HLA-A and/or HLA-B. Shared polymorphisms are highlighted in bold. Polymorphisms are shared between zebrafish and humans at all positions, with the exception of position 150. This overlap in substitutions across species indicates either shared ancestry for these alleles preserved across species, or continued exploration through a highly conserved stereo-chemical space. Additional residues are shown in Table S9.

|               | Allele 1<br>Accession          | Allele 2<br>Accession          | Allelic<br>Diver. | EST or TSA<br>allele support   | EST or TSA<br>allele support   | Species<br>Identifier |
|---------------|--------------------------------|--------------------------------|-------------------|--------------------------------|--------------------------------|-----------------------|
| <b>Psmb8</b>  |                                |                                |                   |                                |                                |                       |
| Human         | <a href="#">NP_683720</a>      | <a href="#">AHW47925.1</a>     | 0.4%              | <a href="#">BQ053596.1</a>     | <a href="#">BM919976.1</a>     | H. sapiens            |
| Xenopus       | <a href="#">NP_001080028.1</a> | <a href="#">NP_001084323.1</a> | 13.4%             | <a href="#">JZ824716.1</a>     | <a href="#">DC123145.1</a>     | X. laevis             |
| Shark         | <a href="#">AAL59862.1</a>     | <a href="#">AAL59861.1</a>     | 22.4%             | -                              | -                              | H. francisci          |
| Salmon        | <a href="#">AAG43439.1</a>     | <a href="#">ACI66984.1</a>     | 27.9%             | <a href="#">DY720790.1</a>     | <a href="#">GO056345.1</a>     | S. salar              |
| Zebrafish     | <a href="#">NP_571467.3</a>    | <a href="#">NP_001017791.1</a> | 30.8%             | <a href="#">EH453180.1</a>     | <a href="#">CO813836.1</a>     | D. rerio              |
| <b>Psmb9</b>  |                                |                                |                   |                                |                                |                       |
| Human         | <a href="#">AAV38527.1</a>     | <a href="#">CAA44603.1</a>     | 0.9%              | <a href="#">CR997314.1</a>     | <a href="#">BQ051470.1</a>     | H. sapiens            |
| Xenopus       | <a href="#">NP_001003660.1</a> | <a href="#">XP_004920717.2</a> | 4.2%              | <a href="#">DN061107.1</a>     | <a href="#">EL726920.1</a>     | X. tropicalis         |
| Shark         | <a href="#">AAL59852.1</a>     | -                              | NA                | -                              | -                              | C. milii              |
| Salmon        | <a href="#">NP_001117174.1</a> | <a href="#">ACI69781.1</a>     | 0.5%              | <a href="#">EG867804.1</a>     | <a href="#">EG797054.1</a>     | S. salar              |
| Zebrafish     | <a href="#">NP_571466.1</a>    | <a href="#">NP_571753.1</a>    | 13.6%             | <a href="#">DN894394.1</a>     | <a href="#">AW076691.1</a>     | D. rerio              |
| <b>Psmb13</b> |                                |                                |                   |                                |                                |                       |
| Human         | -                              | -                              | NA                | -                              | -                              | H. sapiens            |
| Xenopus       | -                              | -                              | NA                | -                              | -                              | X. tropicalis         |
| Shark         | <a href="#">XP_007882653.1</a> | <a href="#">AFK10751.1</a>     | 1.5%              | <a href="#">JK959871.1</a>     | <a href="#">JK931281.1</a>     | C. milii              |
| Salmon        | <a href="#">XP_013997221.1</a> | <a href="#">ABQ59681.1</a>     | 7.2%              | <a href="#">DY734168.1</a>     | <a href="#">DY740375.1</a>     | S. salar              |
| Zebrafish     | <a href="#">NP_571752.1</a>    | <a href="#">GDQH01002062.1</a> | 29.5%             | <a href="#">EH507326.1</a>     | <a href="#">GDQH01002062.1</a> | D. rerio              |
| <b>Tap2</b>   |                                |                                |                   |                                |                                |                       |
| Human         | <a href="#">NP_000535.3</a>    | <a href="#">AAP36912.1</a>     | 0.1%              | <a href="#">BM549545.1</a>     | <a href="#">BG285267.1</a>     | H. sapiens            |
| Xenopus       | <a href="#">NP_001081860.1</a> | <a href="#">NP_001085260.1</a> | 29.5%             | <a href="#">EB467320.1</a>     | <a href="#">CD363178.1</a>     | X. laevis             |
| Shark         | <a href="#">AGQ17917.1</a>     | <a href="#">AAL59859.1</a>     | 0.4%              | -                              | -                              | G. cirratum           |
| Salmon        | <a href="#">NP_001133546.1</a> | <a href="#">NP_001117161.1</a> | 9.1%              | <a href="#">DW580394.1</a>     | <a href="#">GE796559.1</a>     | S. salar              |
| Zebrafish     | <a href="#">GDQH01014094.1</a> | <a href="#">CAD58764.1</a>     | 49.7%             | <a href="#">GDQH01014094.1</a> | <a href="#">EB986911.1</a>     | D. rerio              |
| <b>MHCI</b>   |                                |                                |                   |                                |                                |                       |
| Human         | <a href="#">NP_001229687.1</a> | <a href="#">NP_002108.4</a>    | 20.8%             | <a href="#">BQ900919.1</a>     | <a href="#">AL540488.3</a>     | H. sapiens            |
| Xenopus       | <a href="#">NP_001079871.1</a> | <a href="#">AAF03407.1</a>     | 18.9%             | <a href="#">CF284001.1</a>     | <a href="#">CD329590.1</a>     | X. laevis             |
| Shark         | <a href="#">AAB97322.1</a>     | <a href="#">AAB97346.1</a>     | 16.3%             | -                              | -                              | T. scyllium           |
| Salmon        | <a href="#">AAN75113.1</a>     | <a href="#">AAN75119.1</a>     | 29.1%             | <a href="#">GO056509.1</a>     | <a href="#">GE771800.1</a>     | S. salar              |
| Zebrafish     | <a href="#">NP_571546.1</a>    | <a href="#">Q8HWF3</a>         | 52.0%             | <a href="#">EH497205.1</a>     | <a href="#">EH452240.1</a>     | D. rerio              |

**Table S11. Divergent alleles encoding proteasome, TAP, and MHCI molecules within different vertebrates.** Divergent alleles were identified using the BLAST algorithm with 'EST', 'TSA', and 'nr' databases across representative vertebrate species. Highest divergence levels for predicted amino acid sequences ('Allelic Diver.') were calculated using BLAST, with  $\text{Divergence}(\%) = 100(\%) - \text{Identity}(\%)$ . Levels are likely to underestimate sequence diversity found among species, considering limitations such as under-sampling. No sequence found is indicated by '-', and 'NA' means not applicable (as no percentage could be calculated).

|               | Allele 1<br>Accession          | Allele 2<br>Accession          | Allelic<br>Diver. | EST or TSA<br>allele support   | EST or TSA<br>allele support   | Species<br>Identifier |
|---------------|--------------------------------|--------------------------------|-------------------|--------------------------------|--------------------------------|-----------------------|
| <b>Psmb8</b>  |                                |                                |                   |                                |                                |                       |
| Mouse         | <a href="#">NP_034854.2</a>    | <a href="#">AAA75035.1</a>     | 0.4%              | <a href="#">CX233063.1</a>     | <a href="#">BI412709.1</a>     | M. musculus           |
| Chicken       | -                              | -                              | NA                | -                              | -                              | G. gallus             |
| Coelacanth    | <a href="#">XP_006001021.1</a> | -                              | 31.4%             | <a href="#">GAPS01019864.1</a> | <a href="#">GAPS01046775.1</a> | L. menadoe.           |
| Gar           | <a href="#">XP_015195220.1</a> | <a href="#">XP_006643413.2</a> | 8.5%              | -                              | -                              | L. oculatus           |
| Medaka        | <a href="#">NP_001171881.1</a> | <a href="#">BAD93264.1</a>     | 18.5%             | <a href="#">BJ880842.1</a>     | <a href="#">BJ918390.1</a>     | O. latipes            |
| Fugu          | <a href="#">XP_003978904.1</a> | -                              | 1.5%              | <a href="#">CA591128.1</a>     | -                              | T. rubripes           |
| <b>Psmb9</b>  |                                |                                |                   |                                |                                |                       |
| Mouse         | <a href="#">BAA40680.1</a>     | <a href="#">BAE31463.1</a>     | 2.0%              | <a href="#">BI854415.1</a>     | <a href="#">BY708333.1</a>     | M. musculus           |
| Chicken       | -                              | -                              | NA                | -                              | -                              | G. gallus             |
| Coelacanth    | <a href="#">XP_006001022.1</a> | -                              | 0.9%              | <a href="#">GAPS01037885.1</a> | -                              | L. chalamnae          |
| Gar           | -                              | -                              | NA                | -                              | -                              | L. oculatus           |
| Medaka        | <a href="#">NP_001265756.1</a> | <a href="#">BAA19766.1</a>     | 0.5%              | <a href="#">DC274529.1</a>     | <a href="#">BJ508286.1</a>     | O. latipes            |
| Fugu          | <a href="#">CAC13120.1</a>     | -                              | NA                | -                              | -                              | T. rubripes           |
| <b>Psmb13</b> |                                |                                |                   |                                |                                |                       |
| Mouse         | -                              | -                              | NA                | -                              | -                              | M. musculus           |
| Chicken       | -                              | -                              | NA                | -                              | -                              | G. gallus             |
| Coelacanth    | -                              | -                              | NA                | -                              | -                              | L. chalamnae          |
| Gar           | -                              | -                              | NA                | -                              | -                              | L. oculatus           |
| Medaka        | <a href="#">NP_001171882.1</a> | <a href="#">BAH29626.1</a>     | 9.1%              | <a href="#">DC251640.1</a>     | <a href="#">DC249921.1</a>     | O. latipes            |
| Fugu          | <a href="#">XP_003978905.1</a> | -                              | 1.0%              | <a href="#">BU805709.1</a>     | -                              | T. rubripes           |
| <b>Tap2</b>   |                                |                                |                   |                                |                                |                       |
| Mouse         | <a href="#">AIC84017.1</a>     | <a href="#">BAE31870.1</a>     | 1.1%              | <a href="#">BI659951.1</a>     | <a href="#">CX227308.1</a>     | M. musculus           |
| Chicken       | <a href="#">NP_001092827.1</a> | <a href="#">AEE25622.1</a>     | 1.9%              | <a href="#">CD217563.1</a>     | <a href="#">BU304487.1</a>     | G. gallus             |
| Coelacanth    | <a href="#">XP_006001020.1</a> | -                              | 0.0%              | <a href="#">GAPS01015709.1</a> | -                              | L. chalamnae          |
| Gar           | <a href="#">XP_006001020.1</a> | -                              | NA                | -                              | -                              | L. oculatus           |
| Medaka        | <a href="#">NP_001265816.1</a> | <a href="#">BAB84549.1</a>     | 1.8%              | -                              | -                              | O. latipes            |
| Fugu          | <a href="#">XP_011615666.1</a> | -                              | NA                | -                              | -                              | T. rubripes           |
| <b>MHCI</b>   |                                |                                |                   |                                |                                |                       |
| Mouse         | <a href="#">NP_001001892.2</a> | <a href="#">NP_034510.3</a>    | 16.4%             | <a href="#">CX226952.1</a>     | <a href="#">CX226363.1</a>     | M. musculus           |
| Chicken       | <a href="#">NP_001026509.1</a> | <a href="#">BAD69566.1</a>     | 23.0%             | <a href="#">DR424122.1</a>     | <a href="#">DN930113.1</a>     | G. gallus             |
| Coelacanth    | <a href="#">AAA52345.1</a>     | <a href="#">AAA52352.1</a>     | 14.7%             | <a href="#">GAAA01059221.1</a> | <a href="#">GAAA01003285.1</a> | L. chalamnae          |
| Gar           | <a href="#">XP_015195141.1</a> | <a href="#">XP_015195219.1</a> | 20.6%             | -                              | -                              | L. oculatus           |
| Medaka        | <a href="#">NP_001265807.2</a> | <a href="#">BAJ07296.1</a>     | 22.7%             | <a href="#">DK094922.1</a>     | <a href="#">FS531937.1</a>     | O. latipes            |
| Fugu          | <a href="#">XP_011607434.1</a> | <a href="#">H2RYR0</a>         | 20.3%             | <a href="#">CA589387.1</a>     | <a href="#">CA589387.1</a>     | T. rubripes           |

**Table S12. Divergent alleles encoding proteasome, TAP, and MHCI molecules within additional vertebrates.** Divergent alleles were identified using the BLAST algorithm with 'EST', 'TSA', and 'nr' databases across representative vertebrate species. Highest divergence levels for predicted amino acid sequences ('Allelic Diver.') were calculated using BLAST, with  $\text{Divergence}(\%) = 100(\%) - \text{Identity}(\%)$ . Levels are likely to underestimate sequence diversity found among species, considering limitations such as under-sampling. No sequence found is indicated by '-', and 'NA' means not applicable (as no percentage could be calculated). Sequences highlighted in green were used to calculate divergence.



|            | Diver.<br>Sum | Estimated<br>Level |
|------------|---------------|--------------------|
| Human      | 22.2%         | 1                  |
| Xenopus    | 66.0%         | 3                  |
| Shark      | 40.6%         | 2                  |
| Salmon     | 73.8%         | 3                  |
| Zebrafish  | 175.6%        | 6                  |
| Mouse      | 19.9%         | 1                  |
| Chicken    | 24.9%         | 1                  |
| Coelacanth | 47.0%         | 2                  |
| Gar        | 29.1%         | 2                  |
| Medaka     | 52.6%         | 2                  |
| Fugu       | 22.8%         | 1                  |

**Table S13. Combined allelic diversity estimates for proteasome, TAP, and MHC I molecules.** Sequences provided in tables S11-12 were used to calculate highest divergence levels for alleles from each of the five MHC pathway genes across eleven vertebrate species. Cumulative levels of divergence were summed across the five genes (Diver. Sum) for individual species, and then used to estimate the overall level of lineage diversity throughout the MHC pathway for each species (Estimated Level), using a bin of 30 for levels.

For Datasets S1-5, sequence data are provided in fasta format.

**Dataset S1. Accession numbers and sequence data for proteasome subunits.**

Sequences were derived from tBLASTn searches of 'nr', 'WGS', 'TSA', and 'EST' databases within NCBI querying vertebrate species of interest. Additional searches of the Ensembl and Uniprot databases were used to add additional sequences. The resulting sequences were used for multiple sequence alignments, phylogenetic analysis, and conserved synteny analysis to help identify sequence relationships.

**Dataset S2. Accession numbers and sequence data for TAP subunits.** Sequences were derived from tBLASTn searches of 'nr', 'WGS', 'TSA', and 'EST' databases within NCBI querying vertebrate species of interest. Additional searches of the Ensembl and Uniprot databases were used to add additional sequences. The resulting sequences were used for multiple sequence alignments, phylogenetic analysis, and conserved synteny analysis to help identify sequence relationships.

**Dataset S3. Transcripts associated with zebrafish chromosome 19 core MHC haplotype D genes.** Transcripts assembled from immune tissues of CG2 clonal zebrafish are provided, as listed in Supplemental Table 2, derived from the non-normalized Transcriptome Shotgun Assembly (TSA) which has been deposited under accession GDQH00000000 (the version described in this paper is the first version, GDQH01000000).

**Dataset S4. Zebrafish antigen processing genes from the divergent chromosome 19 haplotype D.** Deduced Proteasome and TAP amino acid sequences are provided from zebrafish core MHC haplotype D. Chromosome number and haplotype identifier are given in parentheses.

**Dataset S5. Zebrafish chromosome 19 core MHC scaffold sequences.** Genomic scaffolds from the CG2 clonal zebrafish assembly (core MHC haplotype D) are provided as illustrated in Figure 2 ('rc' indicates reverse complement), derived from the CG2v1.0 *de novo* assembly which has been deposited under Whole Genome Shotgun (WGS) accession LKPD00000000 (the version described in this paper is the first version, LKPD01000000).

## Supplementary references

1. Tsukamoto, K, Miura F, Fujito N, Yoshizaki G, Nonaka M (2012) Long-lived dichotomous lineages of the proteasome subunit beta type 8 (PSMB8) gene surviving more than 500 million years as alleles or paralogs. *Mol Biol Evol* 29(10):3071–3079.
2. Huang C-H, Tanaka Y, Fujito NT, Nonaka M (2013) Dimorphisms of the proteasome subunit beta type 8 gene (PSMB8) of ectothermic tetrapods originated in multiple independent evolutionary events. *Immunogenetics* 65(11):811–821.
3. Sutoh Y, et al. (2012) Comparative genomic analysis of the proteasome  $\beta 5t$  subunit gene: implications for the origin and evolution of thymoproteasomes. *Immunogenetics* 64(1):49–58.
4. Deverson EV, et al. (1998) Functional analysis by site-directed mutagenesis of the complex polymorphism in rat transporter associated with antigen processing. *J Immunol* 160(6):2767–2779.
5. Guillaume B, et al. (2010) Two abundant proteasome subtypes that uniquely process some antigens presented by HLA class I molecules. *Proc Natl Acad Sci* 107(43):18599–18604.
6. Nielsen M, et al. (2007) NetMHCpan, a method for quantitative predictions of peptide binding to any HLA-A and -B locus protein of known sequence. *PLoS ONE* 2(8):e796.
